# Supplementary material for: A Flexible Genome-Scale SARS-CoV-2 Clone Resource
Source: Preprints.org preprint supplement (doi:10.20944/preprints202004.0009.v4), 2020-06-21
Supplement: Supplementary file 1 [file Key Resources Table.docx]

## KEY RESOURCES TABLE

| REAGENT or RESOURCE | SOURCE | IDENTIFIER |
| --- | --- | --- |
| Antibodies | | |
|  |  |  |
| Bacterial and Virus Strains | | |
| DH5alpha | NEB | Cat#C2987 |
| Deposited Data | | |
| SARS-CoV-2 Strain HKU-SZ-005b | GenBank | MN975262 |
| SARS-CoV-2 Strain Wuhan-Hu-1 | GenBank | MN908947 |
| Oligonucleotides | | |
| Primers | See Table S1 |  |
| Recombinant DNA | | |
| Gateway-compatible entry vector pDONR207 | Invitrogen | Cat#12213013 |
| Gateway-compatible entry vector pDONR221 | Invitrogen | Cat#12536017 |
| Gateway-compatible entry vector pDONR223 | Rual et al., 2004 |  |
| SARS-CoV-2 coding sequences and fragments | See Table S2 |  |
